# Supplementary material for: Safety of low-molecular-weight heparin compared to unfractionated heparin in hemodialysis: a systematic review and meta-analysis
Source: Springer Nature journal article supplement (doi:10.1186/s12882-017-0596-4), 2017-06-07
Supplement: MOESM2 [file 12346834]

Table S1: Cholesterol weighted mean difference.

| Study                 | LMWH                    | UFH                     | WMD (95% CI) (mg/dl)       |
|-----------------------|-------------------------|-------------------------|----------------------------|
|                       | mean change, SD (mg/dl) | mean change, SD (mg/dl) |                            |
| Al-Saran et al**      | -47.95 ± 57.87          | -20.88 ± 38.81          | -27.07 (-55.55, 1.41)      |
| Deuber et al (part 1) | -44 ± 18.52             | 3 ± 29.72               | -47.00 (-77.69, -16.31)    |
| Deuber et al (part 2) | -73 ± 66.14             | 112 ± 49.03             | -185.00 (-257.17, -112.83) |
| Elisaf et al          | -21 ± 45.74             | -5 ± 41.73              | -16.00 (-35.68, 3.68)      |
| Kronenberg et al      | 9.5 ± 43.13             | -14.20 ± 42.05          | 23.70 (-0.40, 47.80)       |
| Lai et al**           | -7.34 ± 38.43           | -14.69 ± 41.72          | 7.35 (-10.23, 24.93)       |
| Leu et al**           | -50.65 ± 43.15          | 25.13 ± 42.54           | -75.78 (-102.34, -49.22)   |
| Saltissi et al**      | -1.16 ± 34.86           | 0 ± 35.58               | -1.16 (-17.43, 15.11)      |
| Schmitt et al         | -30 ± 54.25             | 26 ± 52.03              | -56.00 (-87.41, -24.59)    |
| Schrader et al        | 11 ± 66.78              | 5 ± 50.51               | 6.00 (-21.74, 33.74)       |
| Summary               |                         |                         | -28.70 (-51.43, -5.98)     |

\*\*Results were expressed in mmol/L, we converted them in mg/dl to be able to pool them.

Table S2: Triglycerides weighted mean difference.

| Study                 | LMWH                    | UFH                     | WMD (95% CI) (mg/dl)       |
|-----------------------|-------------------------|-------------------------|----------------------------|
|                       | mean change, SD (mg/dl) | mean change, SD (mg/dl) |                            |
| Al-Saran et al**      | -4.43 ± 168.40          | -35.43 ± 72.30          | 31.00 (-43.90, 105.90)     |
| Deuber et al (part 1) | -151 ± 31.48            | -11 ± 83.22             | -140.00 (-217.99, -62.01)  |
| Deuber et al (part 2) | -120 ± 99.24            | 249 ± 128.21            | -369.00 (-511.11, -226.89) |
| Elisaf et al          | -15 ± 50.57             | -1 ± 77                 | -14.00 (-43.29, 15.29)     |
| Kronenberg et al      | -0.20 ± 90.01           | -27.3 ± 86.96           | 27.10 (-22.97, 77.17)      |
| Lai et al**           | -31.00 ± 63.62          | -11.52 ± 108.19         | -19.48 (-53.38, 19.42)     |
| Leu et al**           | -28.34 ± 285.14         | 18.60 ± 273.65          | -46.94 (-220.15, 126.27)   |
| Saltissi et al**      | 5.31 ± 53.60            | -14.17 ± 71.13          | 19.48 (-9.61, 48.57)       |
| Schmitt et al         | -3 ± 105.70             | 38 ± 114.60             | -41.00 (-106.14, 24.14)    |
| Schrader et al**      | 0 ± 122.50              | 68 ± 156.70             | -68.00 (-133.90, -2.10)    |
| Stefoni et al         | -28.90 ± 72.07          | 3.10 ± 74.50            | -32.00 (-59.65, -4.35)     |
| Yang et al (part 2)   | -146.7 ± 89.76          | 64.30 ± 63.44           | -211.00 (-279.12, -142.88) |
| Summary               |                         |                         | -55.57 (-94.49, -16.66)    |

\*\*Results were expressed in mmol/L, we converted them in mg/dl to be able to pool them.

Table S3: Osteoporosis expressed by OPG/RANKL ratio changes.

| Study           | Measure type               | OPG             |                 |                 |                 | RANKL           |                  |                 |                |
|-----------------|----------------------------|-----------------|-----------------|-----------------|-----------------|-----------------|------------------|-----------------|----------------|
|                 |                            | LMWH            |                 | UFH             |                 | LMWH            |                  | UFH             |                |
|                 |                            | Start of study  | End of study    | Start of study  | End of study    | Start of study  | End of study     | Start of study  | End of study   |
| Cianciolo et al | Mean $\pm$ SD (log transf) | 2.66 $\pm$ 0.98 | 2.85 $\pm$ 0.96 | 2.96 $\pm$ 0.85 | 2.80 $\pm$ 0.91 | 1.07 $\pm$ 1.13 | 0.83 $\pm$ 0.60  | 2.17 $\pm$ 1.84 | 1.24 $\pm$ 1.0 |
| Klejna et al    | Median (range)             | 10.1 (4.2-28.1) | 10.9 (4.6-26.5) | 11.1 (4.9-19.1) | 10.6 (5.7-33.4) | 109 (40-301)    | 151.2 (43.4-386) | 144 (83-361)    | 136 (81.7-315) |

Table S4: Sensitivity analyses with for cholesterol, triglycerides, LSL-cholesterol with different correlation factors

| <b>Outcome</b>           | <b>Correlation factor of 0.3</b> | <b>Correlation factor of 0.5</b> | <b>Correlation factor of 0.8</b> |
|--------------------------|----------------------------------|----------------------------------|----------------------------------|
|                          | WMD (%95 CI)                     | WMD (%95 CI)                     | WMD (%95 CI)                     |
| <b>Total cholesterol</b> | -27.38 (-50.78, -3.98)           | -28.70 (-51.43, -5.98)           | -32.25 (-55.08, -9.42)           |
| <b>Triglycerides</b>     | -53.76 (-94.98, -12.53)          | -55.57 (-94.49, -16.66)          | -60.78 (-97.74, -23.83)          |
| <b>LDL-cholesterol</b>   | -14.49 (-35.73, 6.75)            | -14.88 (-36.27, 6.51)            | -15.49 (-37.56, 6.57)            |

WMD: weighed mean difference in mg/dl; results from correlation factor of 0.5 are the reference (main analysis)

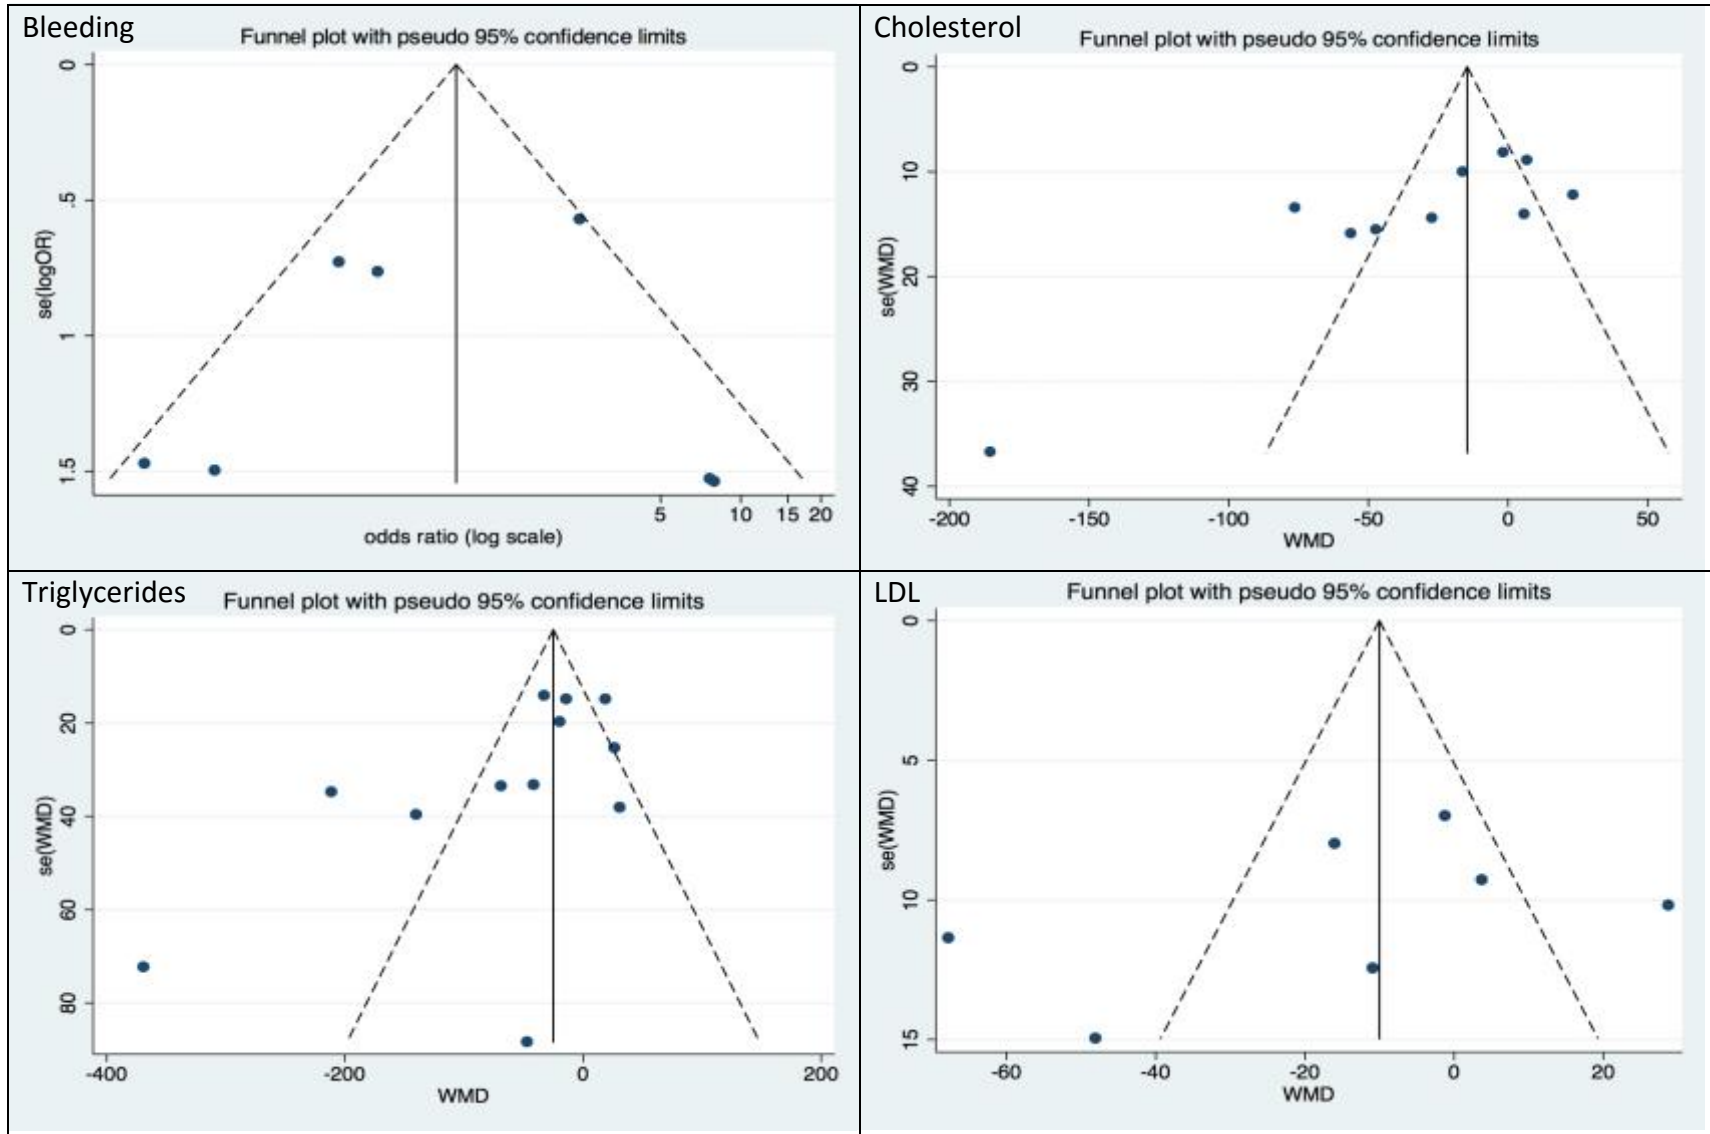

Supplementary figure S1: Funnel plots for publication bias evaluating bleeding, cholesterol, triglycerides and LDL-cholesterol
